# Supplementary material for: Human Superantibodies to 3CLpro Inhibit Replication of SARS-CoV-2 across Variants
Source: MDPI journal article supplement (doi:10.3390/ijms23126587), 2022-06-13
Supplement: s1 [file s1]

## Supplementary data

**Table S1.** PCR mixture for 1 reaction

| Component                                     | Volume (μL) |
|-----------------------------------------------|-------------|
| 10x <i>Taq</i> DNA polymerase buffer with KCl | 1.25        |
| 25 mM MgCl <sub>2</sub>                       | 0.75        |
| 10 mM dNTPs                                   | 0.50        |
| 10 μM forward primer                          | 0.25        |
| 10 μM reverse primer                          | 0.25        |
| Nuclease free water                           | 9.40        |
| Total                                         | 12.5        |

**Table S2.** PCR thermal cycles

| Step                 | Temperature (°C)# | Time           |
|----------------------|-------------------|----------------|
| Initial denaturation | 95                | 10 min         |
| 10 cycles of         |                   |                |
| 1. Denaturation      | 95                | 30 s           |
| 2. Annealing         | 55                | 30 s           |
| 3. Extension         | 72                | 1 min per 1 kb |
| Final extension      | 72                | 5 min          |

**Table S3.** Oligonucleotide primer sequences used in this study

| Primer               | Sequence (5'-3')           | Annealing temperature (°C) |
|----------------------|----------------------------|----------------------------|
| T7 promotor          | TAATACGACTCACTATAGGG       | 55                         |
| T7 terminator        | GCTAGTTATTGCTCAGCGG        | 55                         |
| R1                   | CCATGATTACGCCAAGCTTTGGAGCC | 55                         |
| R2                   | GCTAGATTTCAAAACAGCAGAAAGG  | 55                         |
| SARS-CoV-2 E forward | ACAGGTACGTTAATAGTTAATAGCGT | 60                         |
| SARS-CoV-2 E reverse | ATATTGCAGCAGTACGCACACA     | 60                         |
